# Supplementary material for: Emergence of methicillin resistance predates the clinical use of antibiotics
Source: PubMed Central journal article supplement (PMC8810379; doi:10.1038/s41586-021-04265-w), 2022-01-05
Supplement: 41586_2021_4265_MOESM1_ESM.pdf [file 41586_2021_4265_MOESM1_ESM.pdf]

**Supplementary information**

---

**Emergence of methicillin resistance  
predates the clinical use of antibiotics**

---

In the format provided by the  
authors and unedited

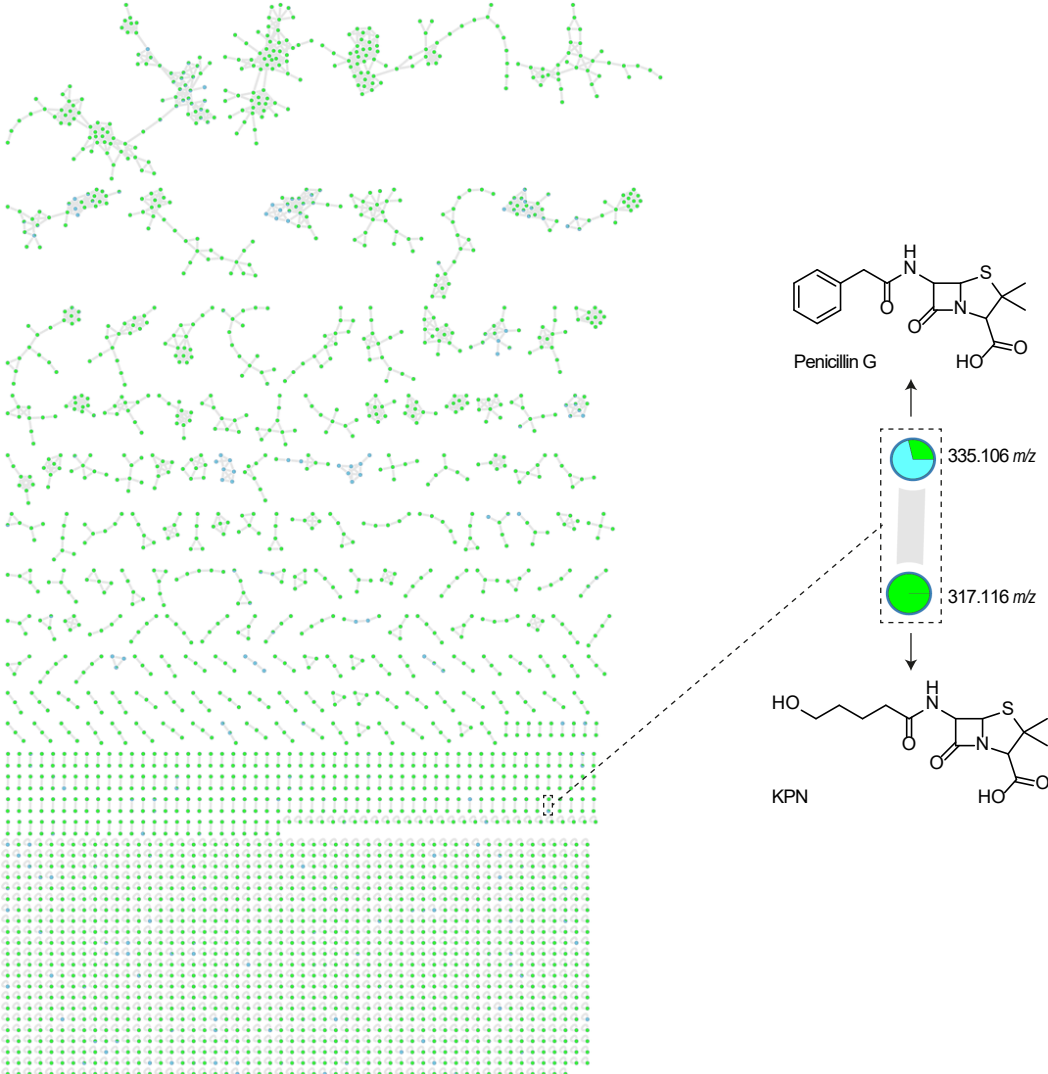

**Supplementary Fig. 1 | Molecular networking analysis of LC-MS data from *T. erinacei* culture broth.** Nodes within the network are represented as pie charts to visualize spectral count differences for each molecule between a pure standard of penicillin G (blue) and *T. erinacei* culture broth (green). The connected nodes corresponding to penicillin G and KPN are highlighted.

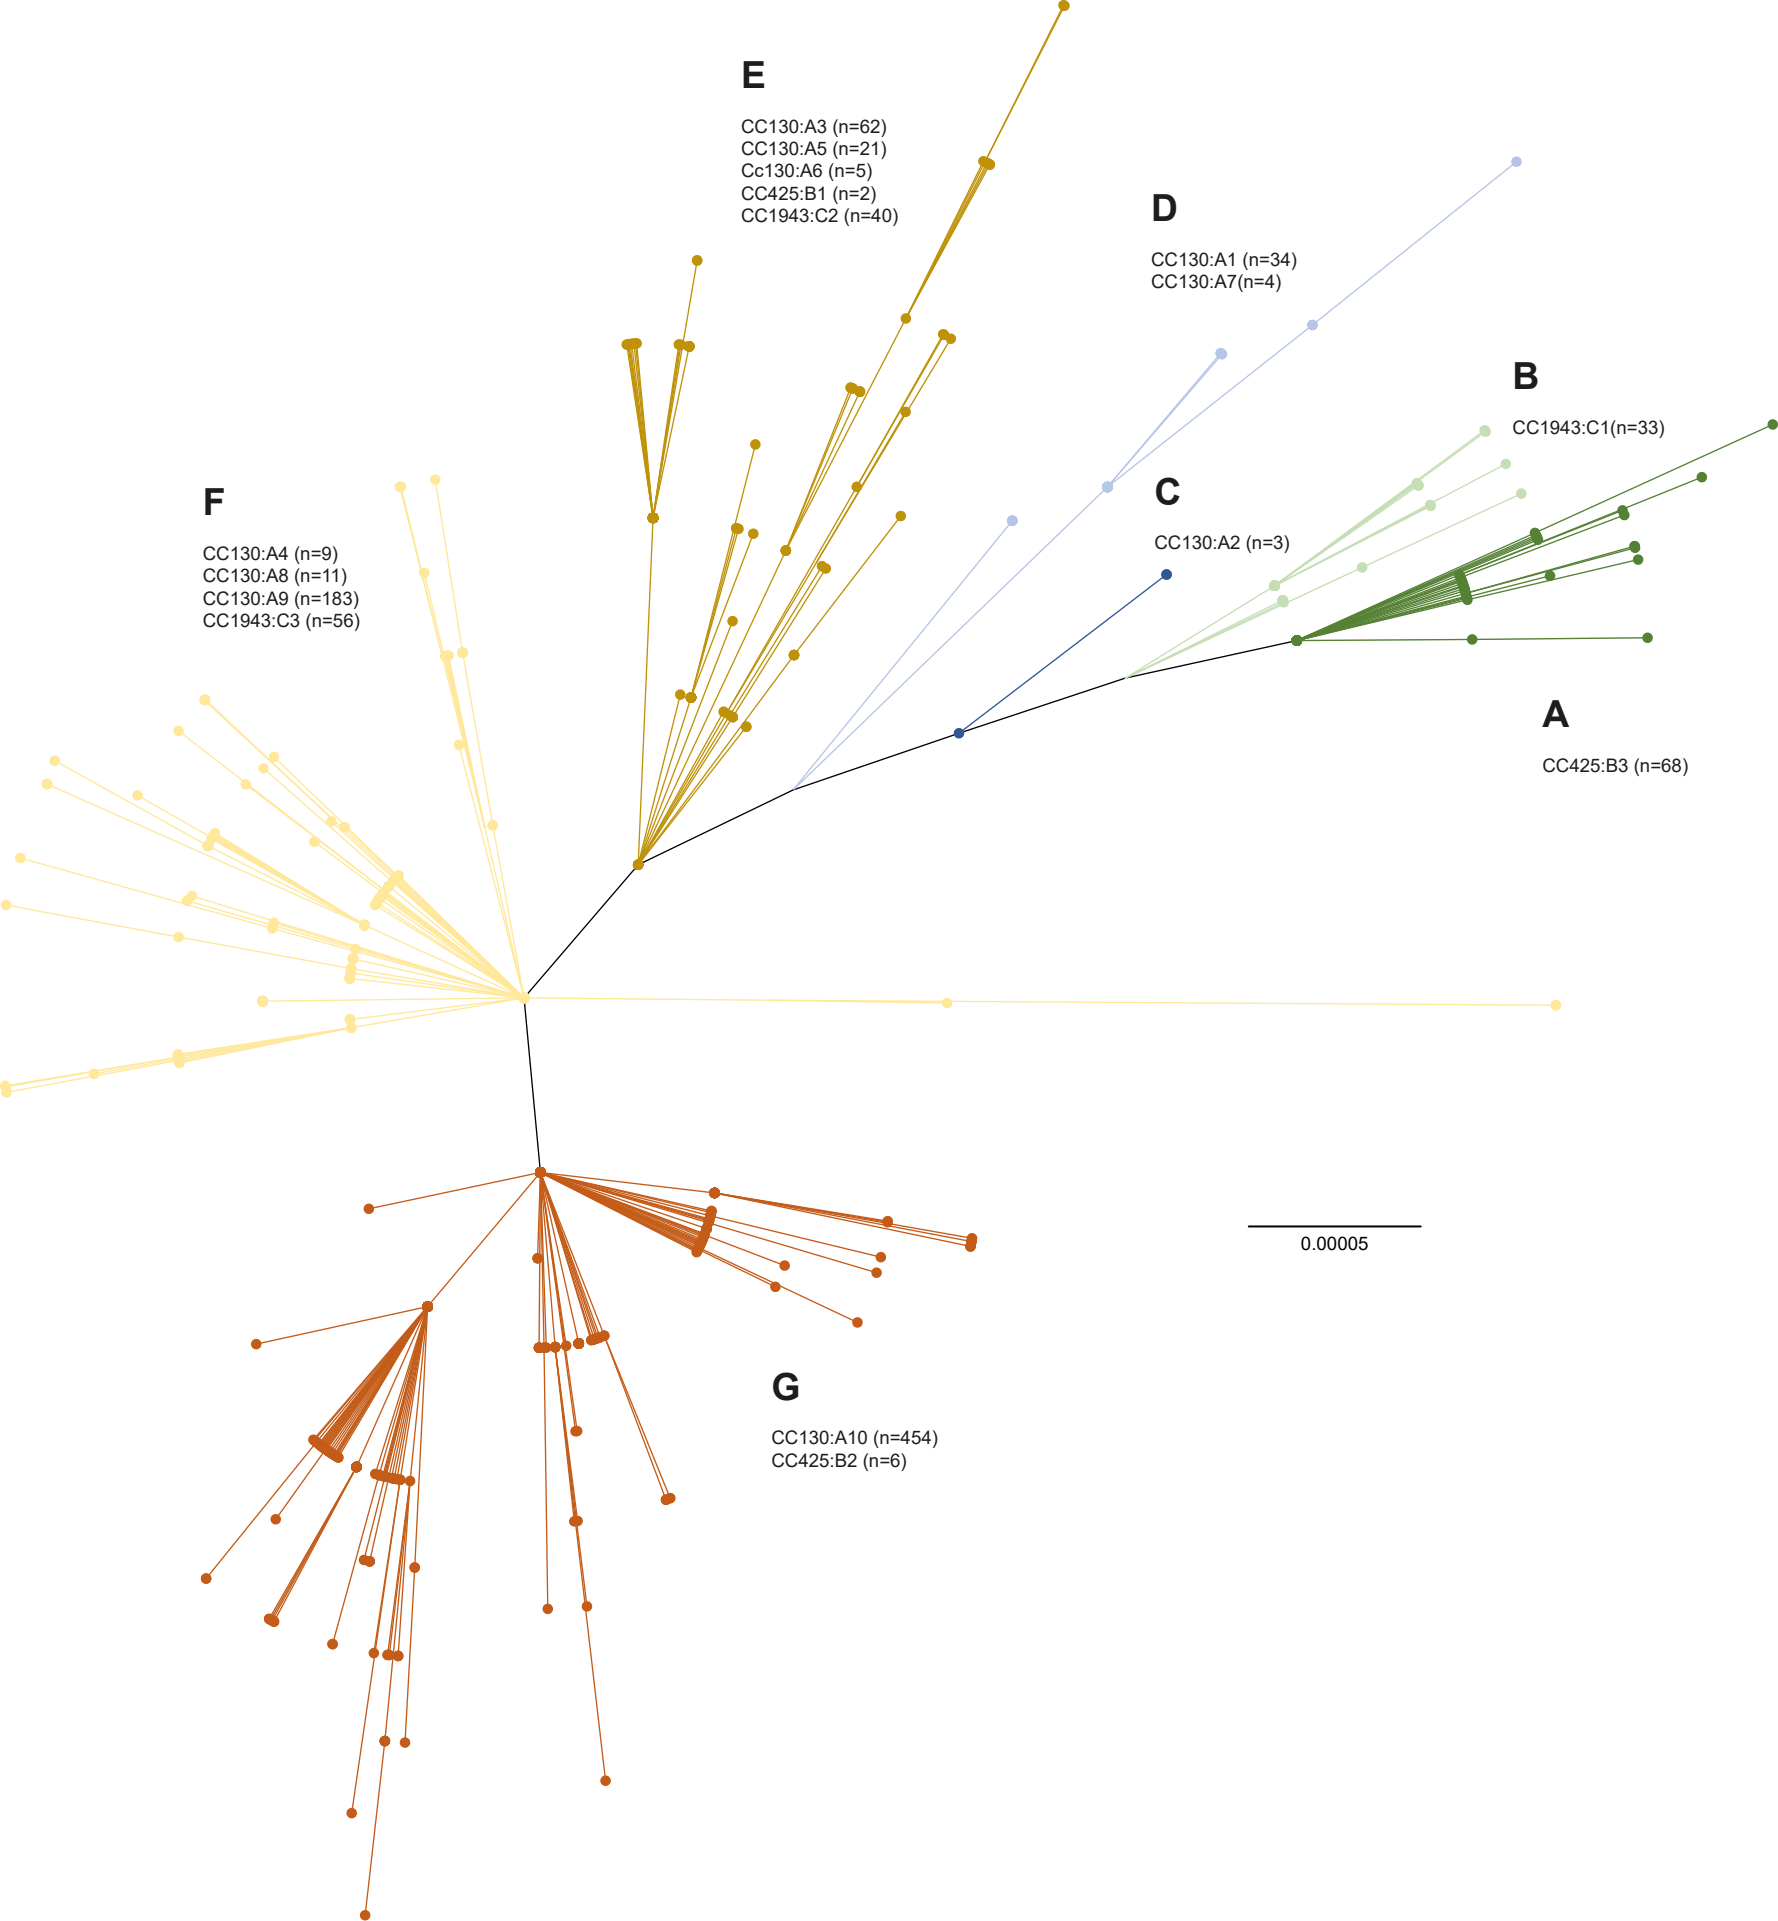

**Supplementary Fig. 2 | Phylogenetic tree of the type XI SCCmec element from 991 *mecC*-MRSA CC130, CC425, and CC1943 isolates.** The undated ClonalFrameML phylogeny was estimated for 350 high-quality core SNPs. The scale bar represents the number of nucleotide substitutions per site. The evolution of the type XI SCCmec elements could be traced back to seven nodes that were connected to each other on a long backbone (black branches). Each of the backbone nodes and its orthologous descendants received the same letter designation to reflect their genetic relationship (A to G). Tips are illustrated by filled circles coloured to indicate the type XI SCCmec variant. Manual mapping of the tips onto the CC130, CC425, and CC1943 phylogenies, and vice versa, enabled us to assign the *mecC*-MRSA isolates to 16 monophyletic lineages harbouring orthologous type XI SCCmec elements (Supplementary Figs. 3-5).







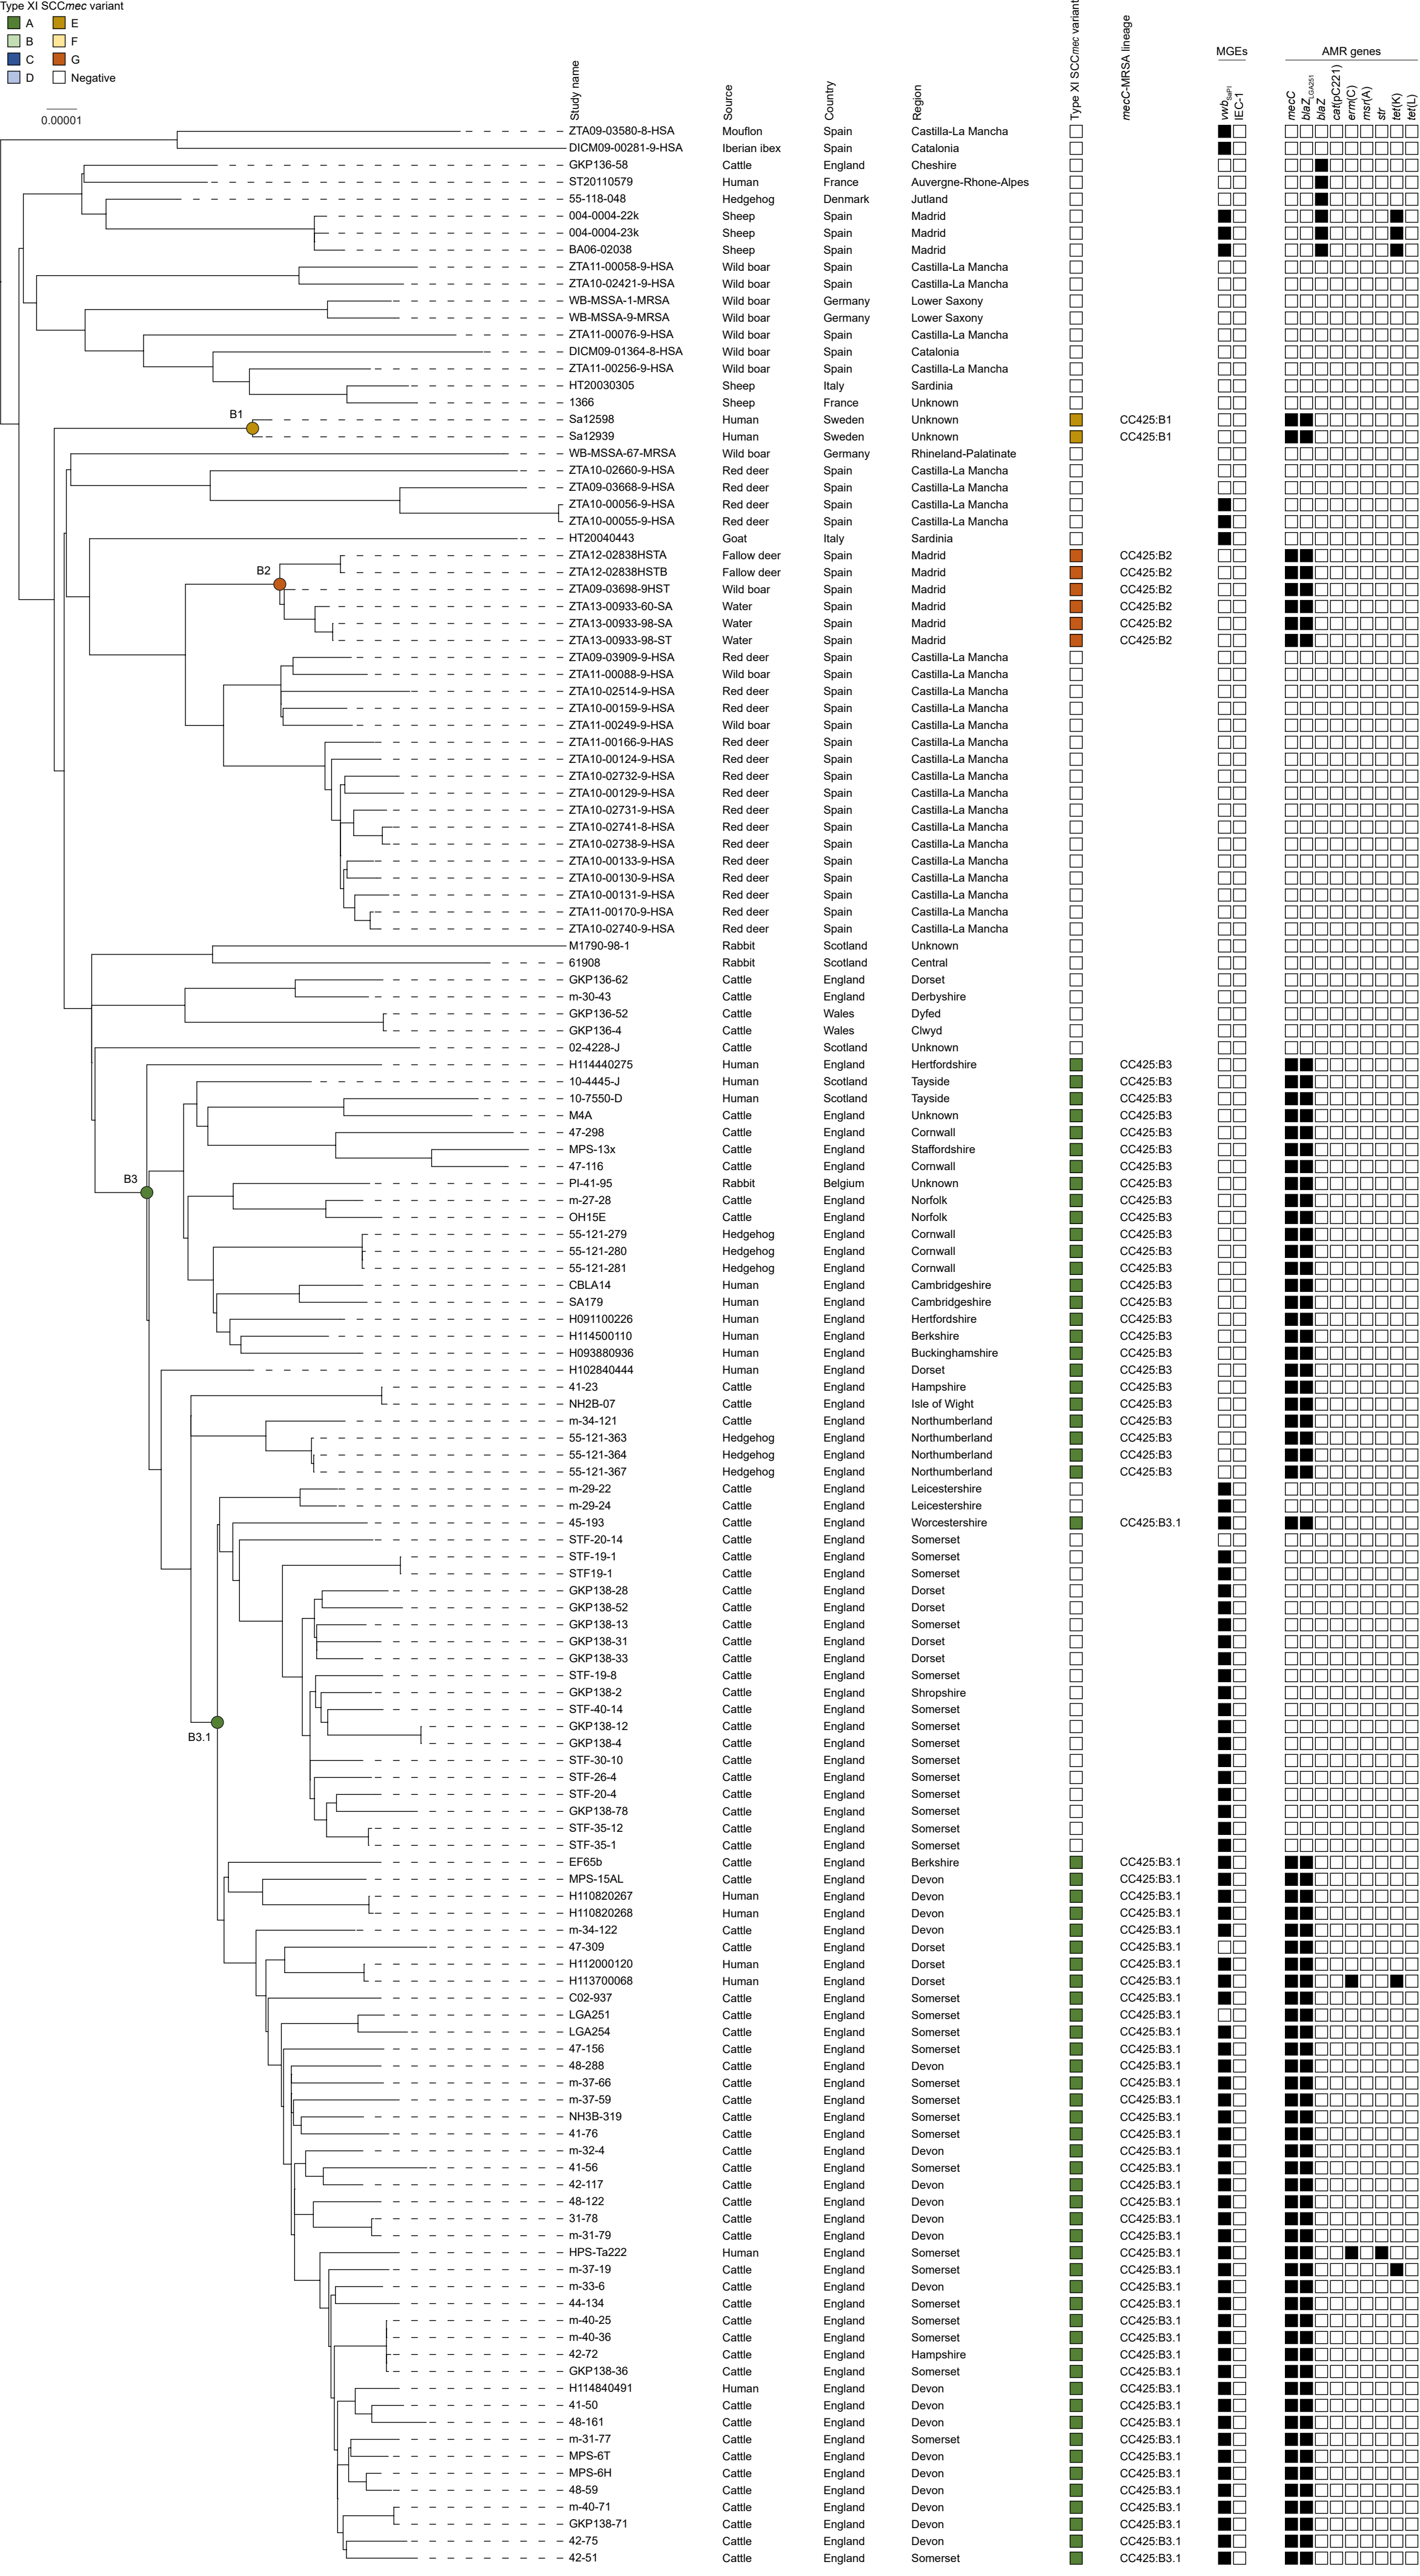

**Supplementary Fig. 4 | Phylogenetic tree of 144 *S. aureus* CC425 isolates.** The unrooted ClonalFrameML phylogeny was built from a core-genome SNP alignment (14,472 SNPs). The tree was rooted at the most recent common ancestor (MRCA) of *S. aureus* CC425 (see Methods). The scale bar represents the number of nucleotide substitutions per site. Manual mapping of the type XI SCCmec variants (Supplementary Fig. 2) onto the phylogeny enabled us to assign the 76 *mecC*-MRSA CC425 isolates to three monophyletic lineages harbouring orthogonal type XI SCCmec elements (CC425:B1 through CC425:B3). The CC425:B3 isolates forming a distinct sublineage (CC425:B3.1) are also displayed (see Results and Figs. 3 and 4). The MRCA of each lineage are illustrated by filled circles coloured to indicate the type XI SCCmec variant. Presence and absence of antibiotic resistance genes (ARGs) and mobile genetic elements (MGEs) encoding human- and ruminant-specific immune modulators involved in host switching events are shown as black and white boxes, respectively.

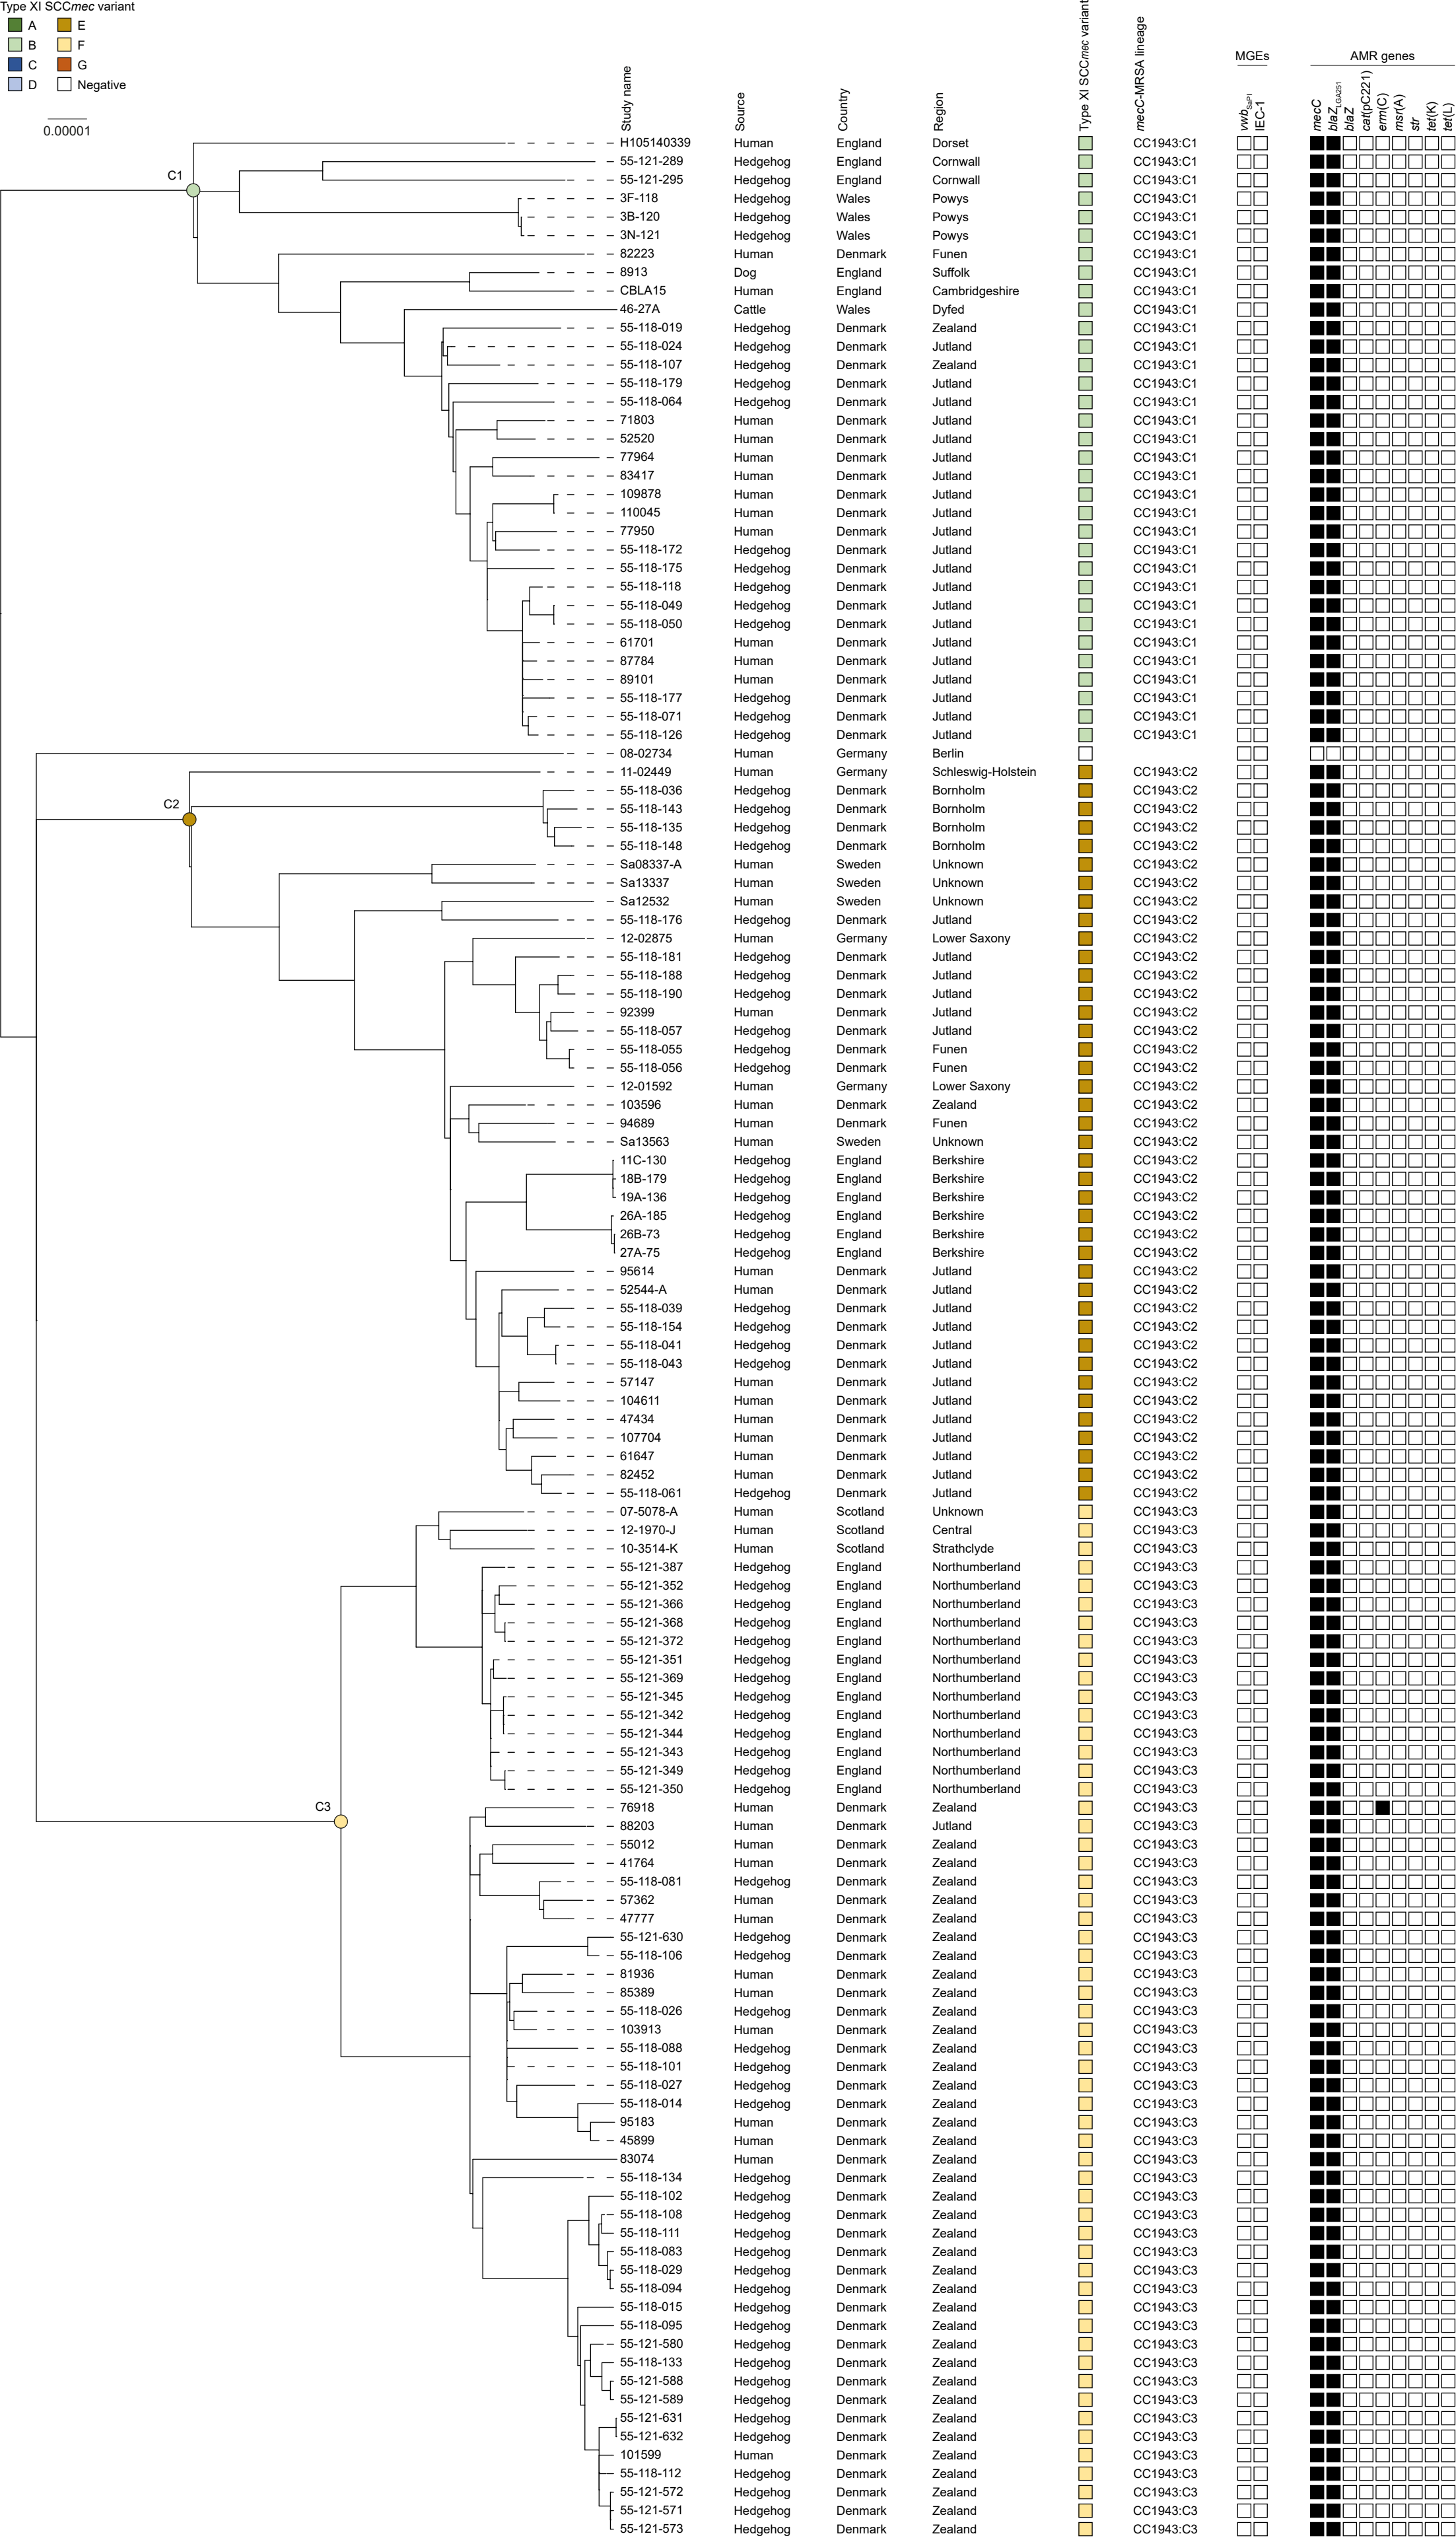









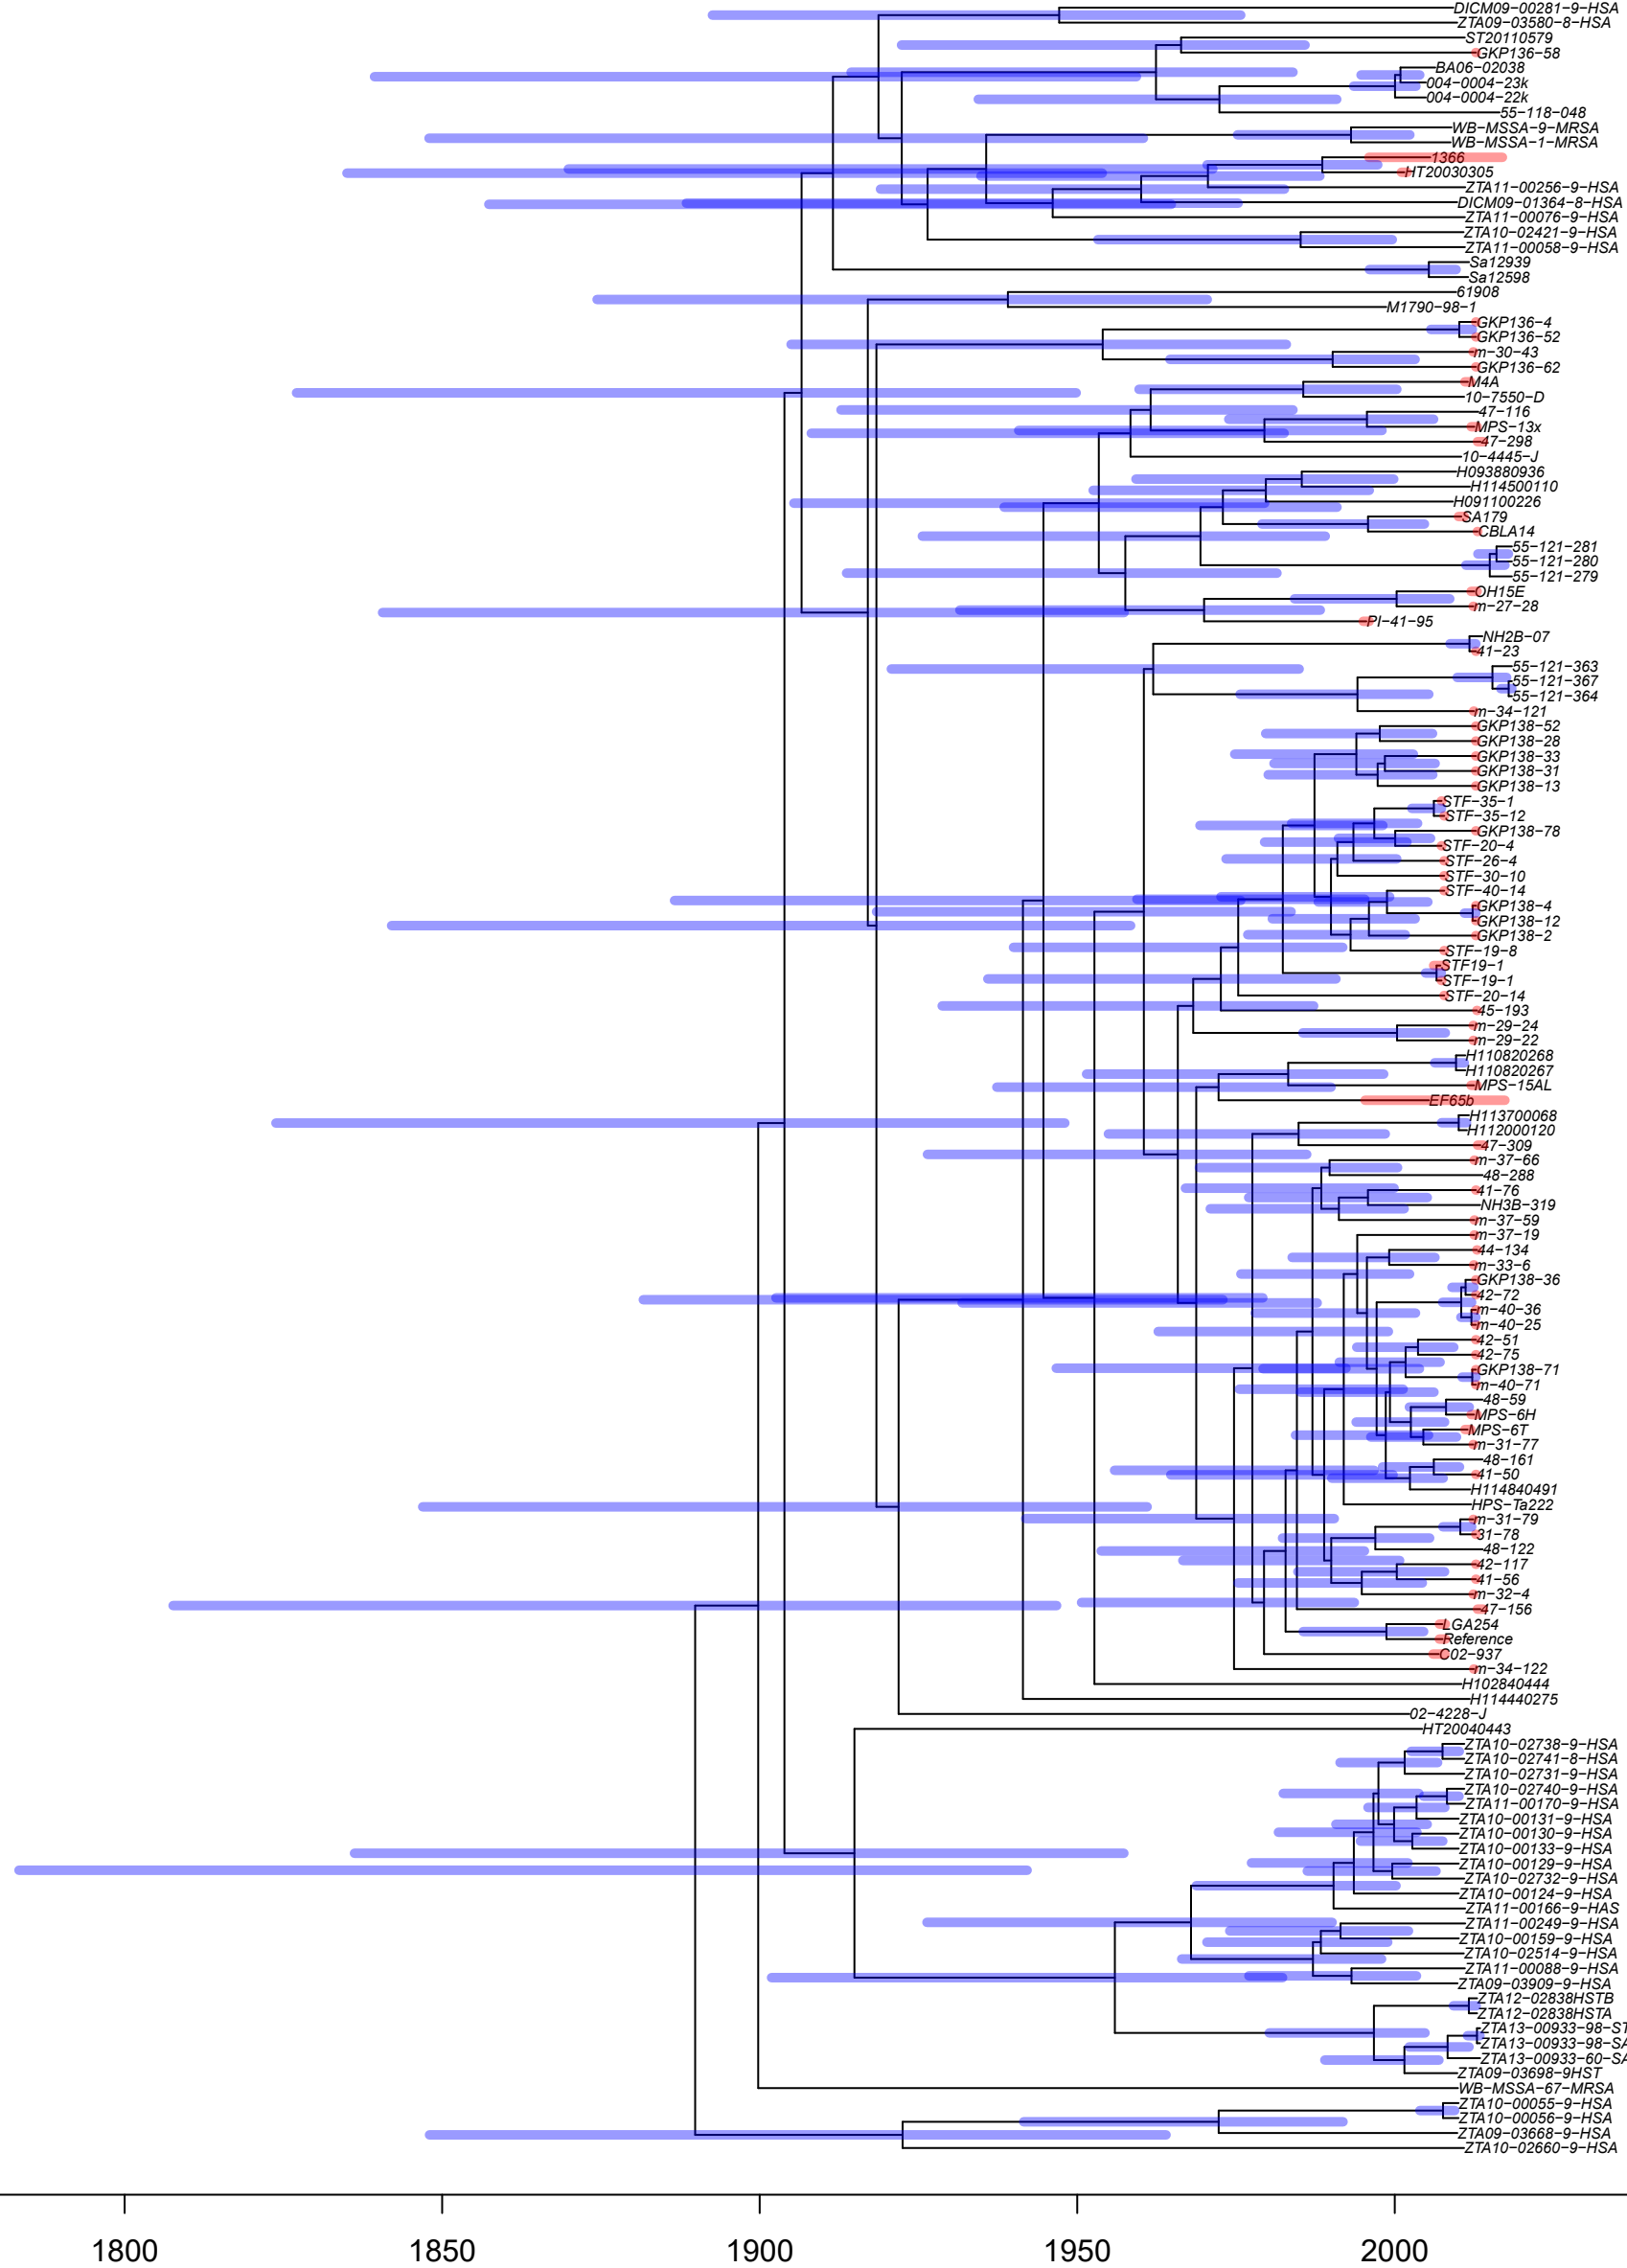

**Supplementary Fig. 8 | BactDating genealogy of 144 *S. aureus* CC425 isolates.** The genealogy was built from the recombination-corrected ClonalFrameML tree (Supplementary Fig. 4). Blue and red bars show the 95% confidence intervals for ancestral dates and unknown sampling dates, respectively.

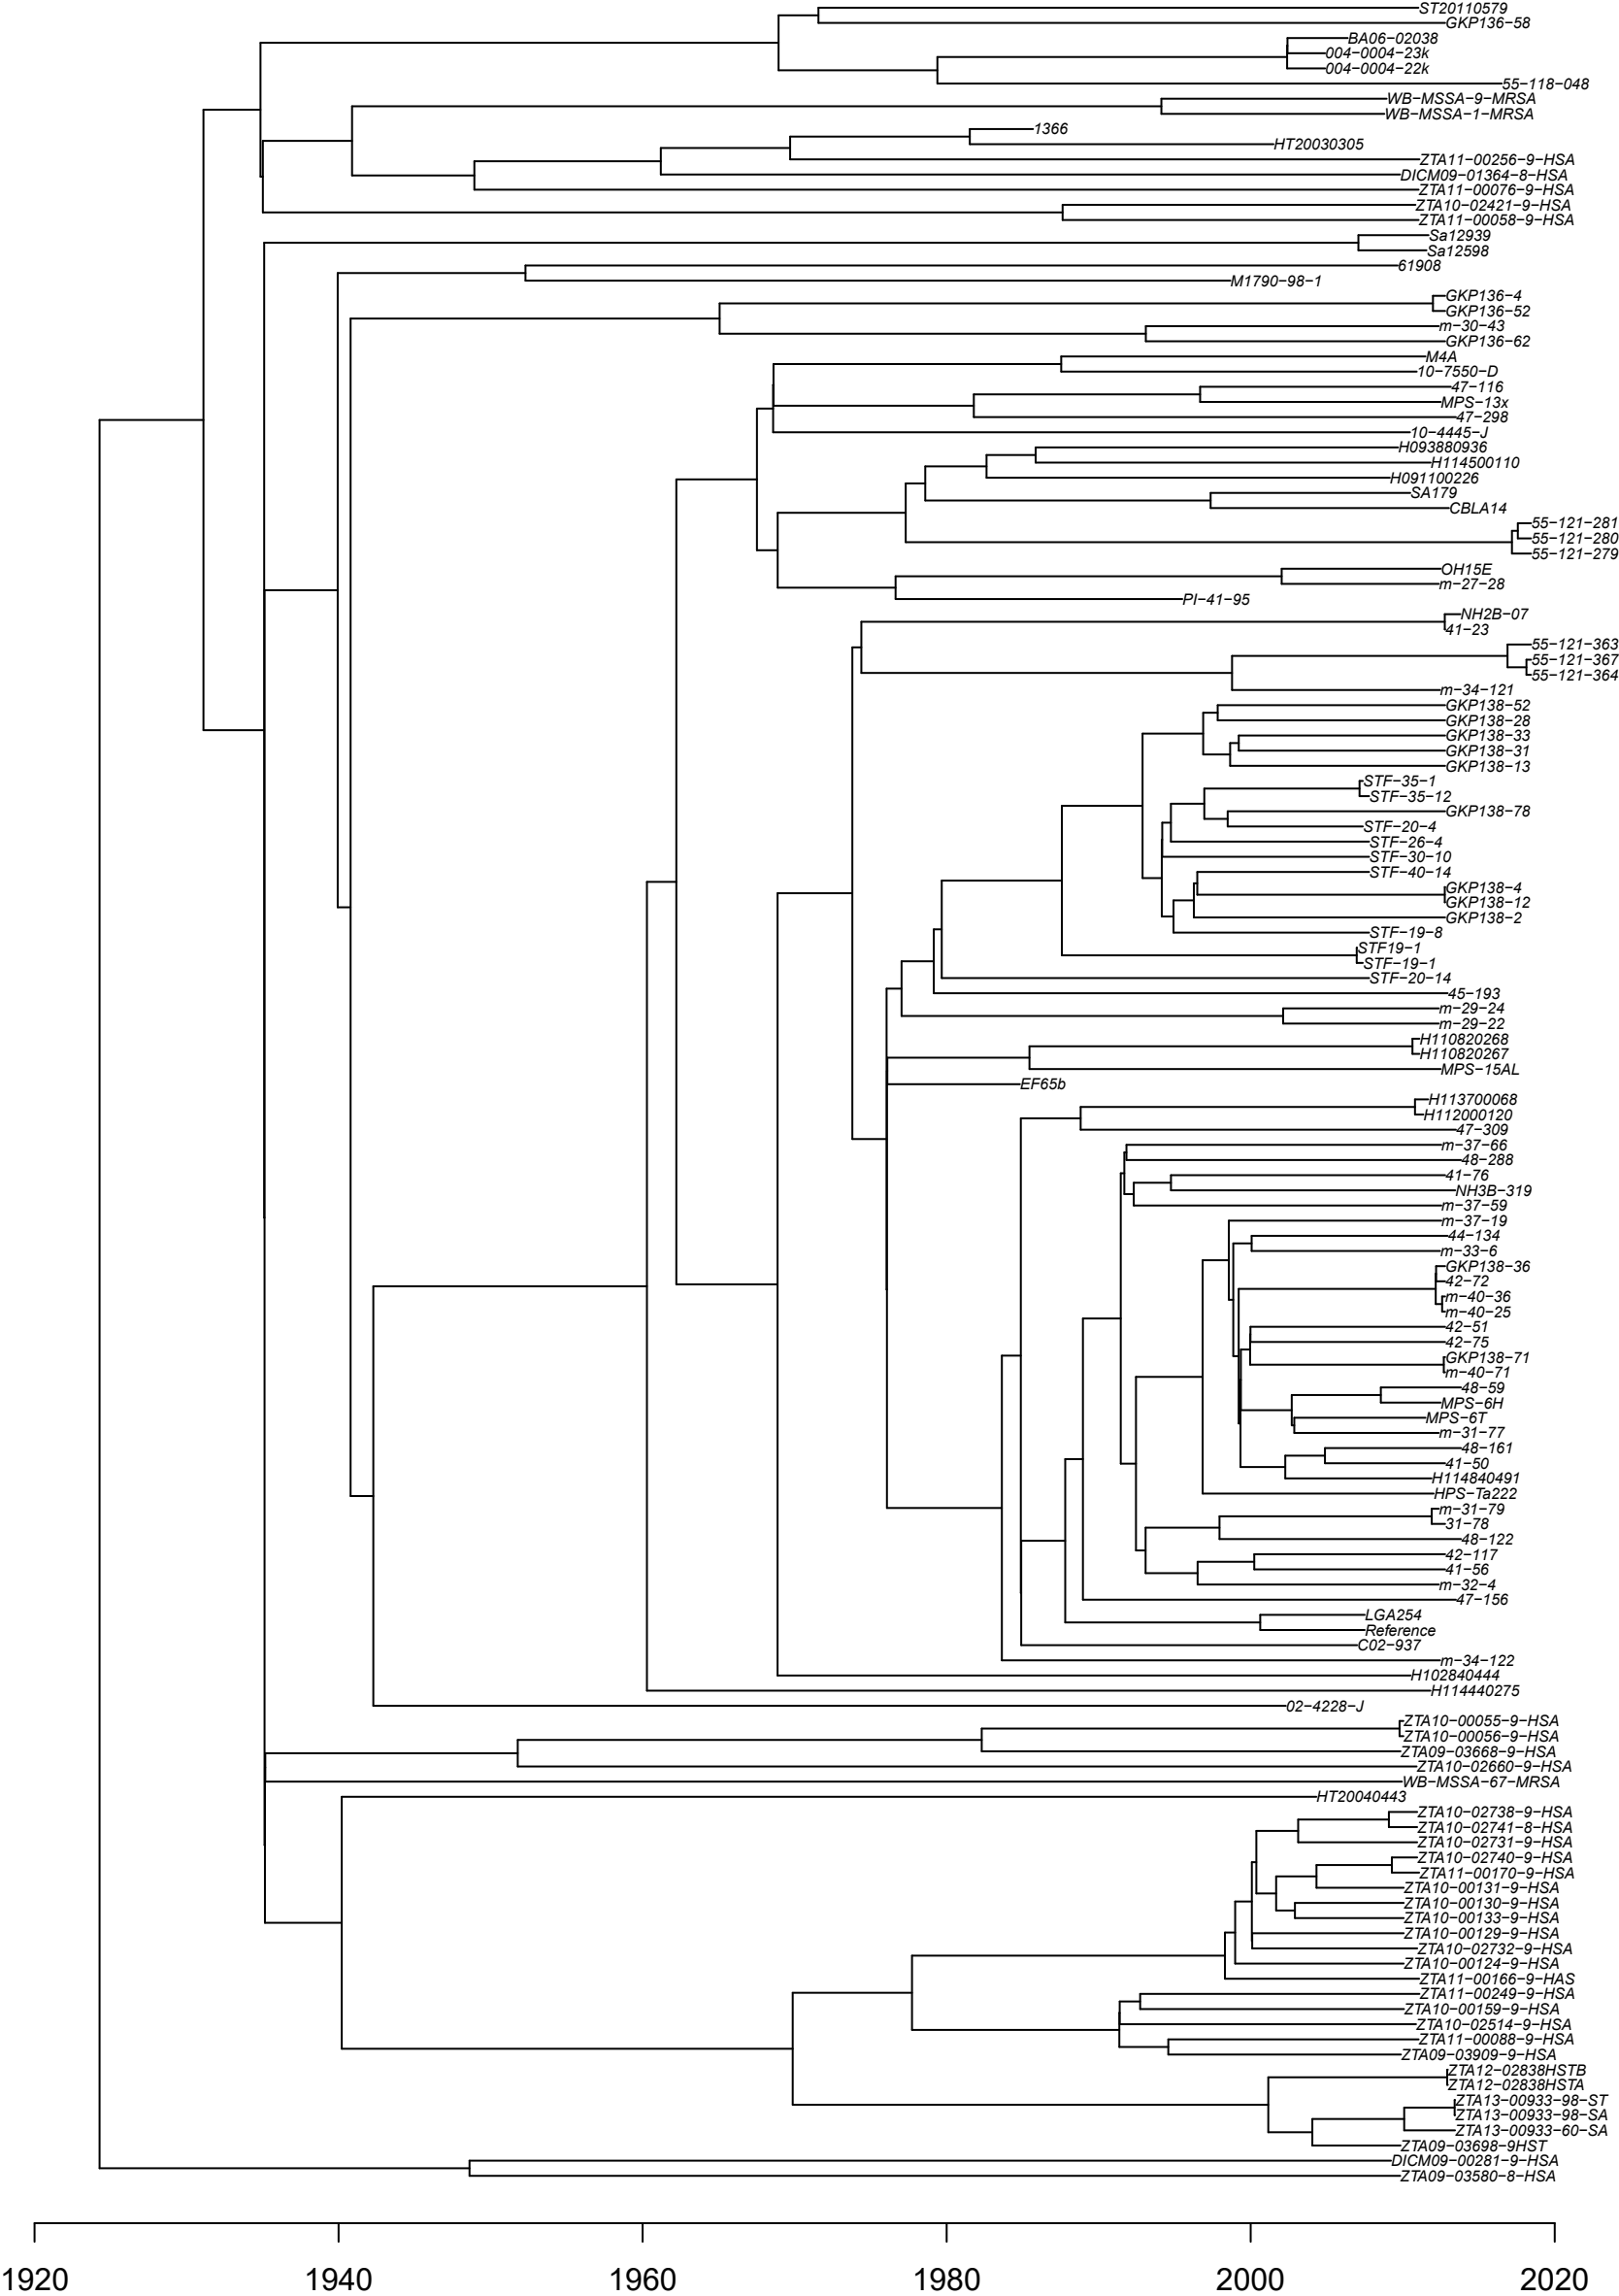

**Supplementary Fig. 9 | treedater genealogy of 144 *S. aureus* CC425 isolates.** The genealogy was built from the recombination-corrected ClonalFrameML tree (Supplementary Fig. 4).



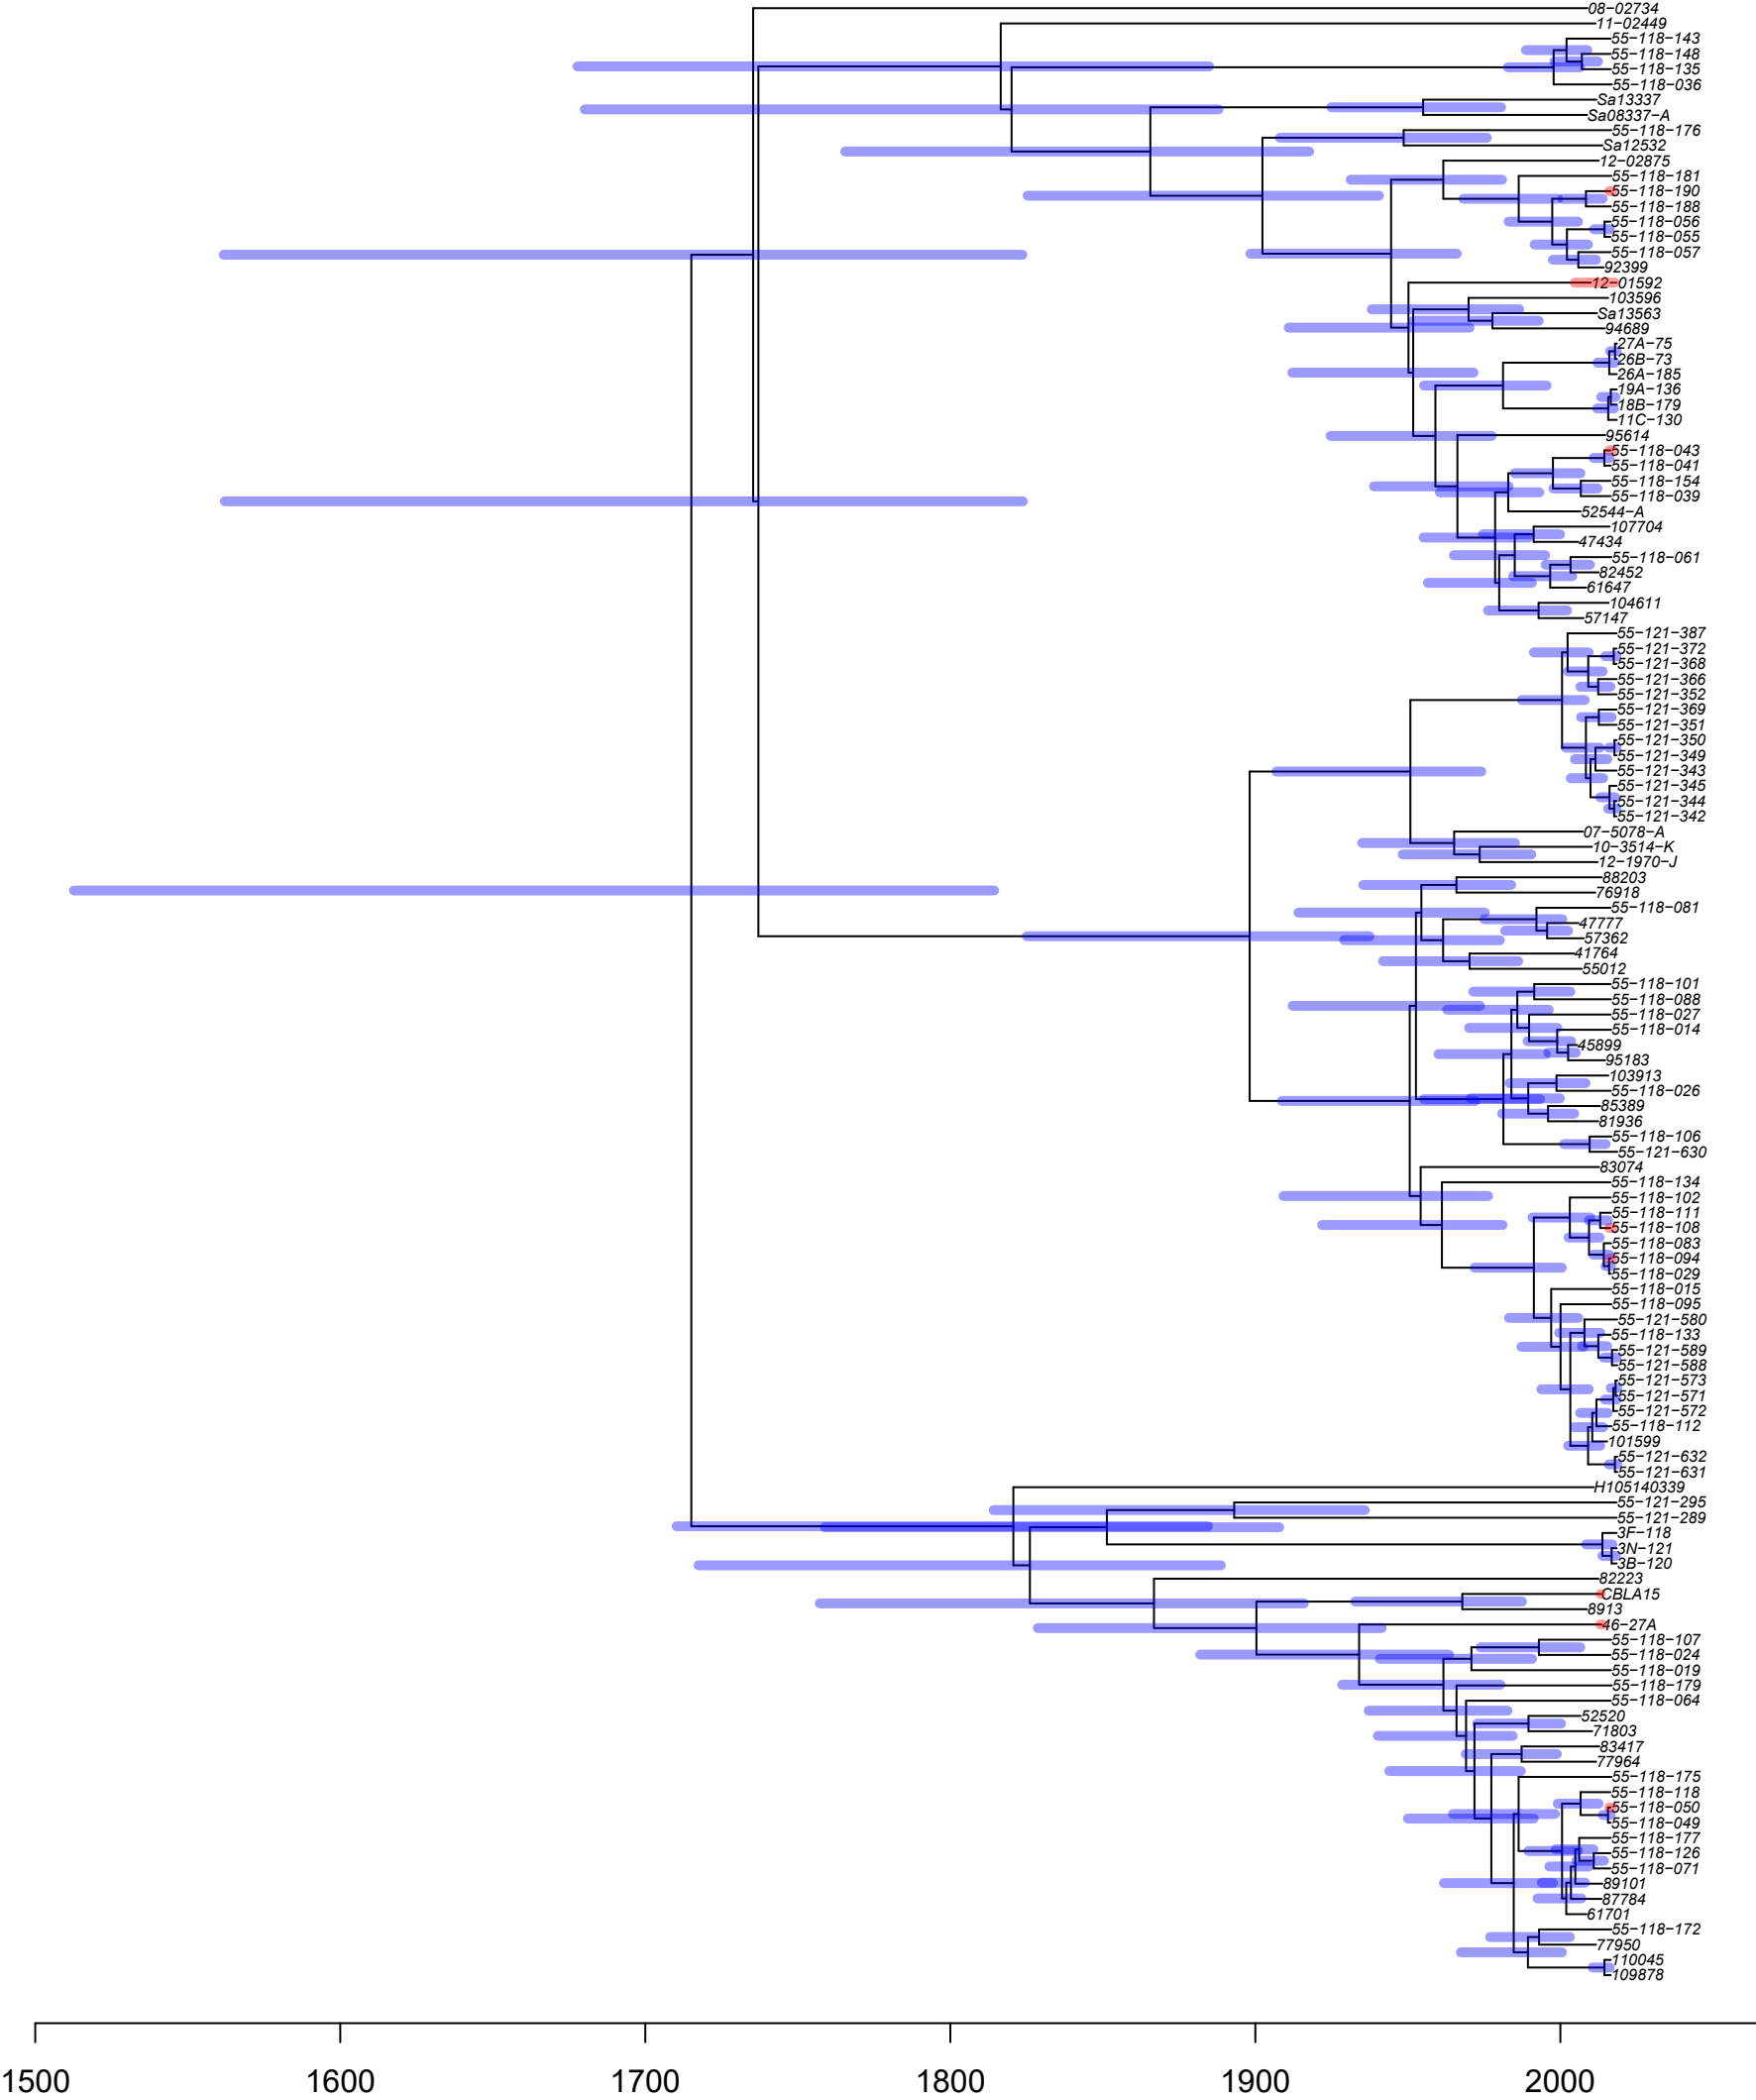

**Supplementary Fig. 10 | BactDating genealogy of 130 *S. aureus* CC1943 isolates.** The genealogy was built from the recombination-corrected ClonalFrameML tree (Supplementary Fig. 5). Blue and red bars show the 95% confidence intervals for ancestral dates and unknown sampling dates, respectively.

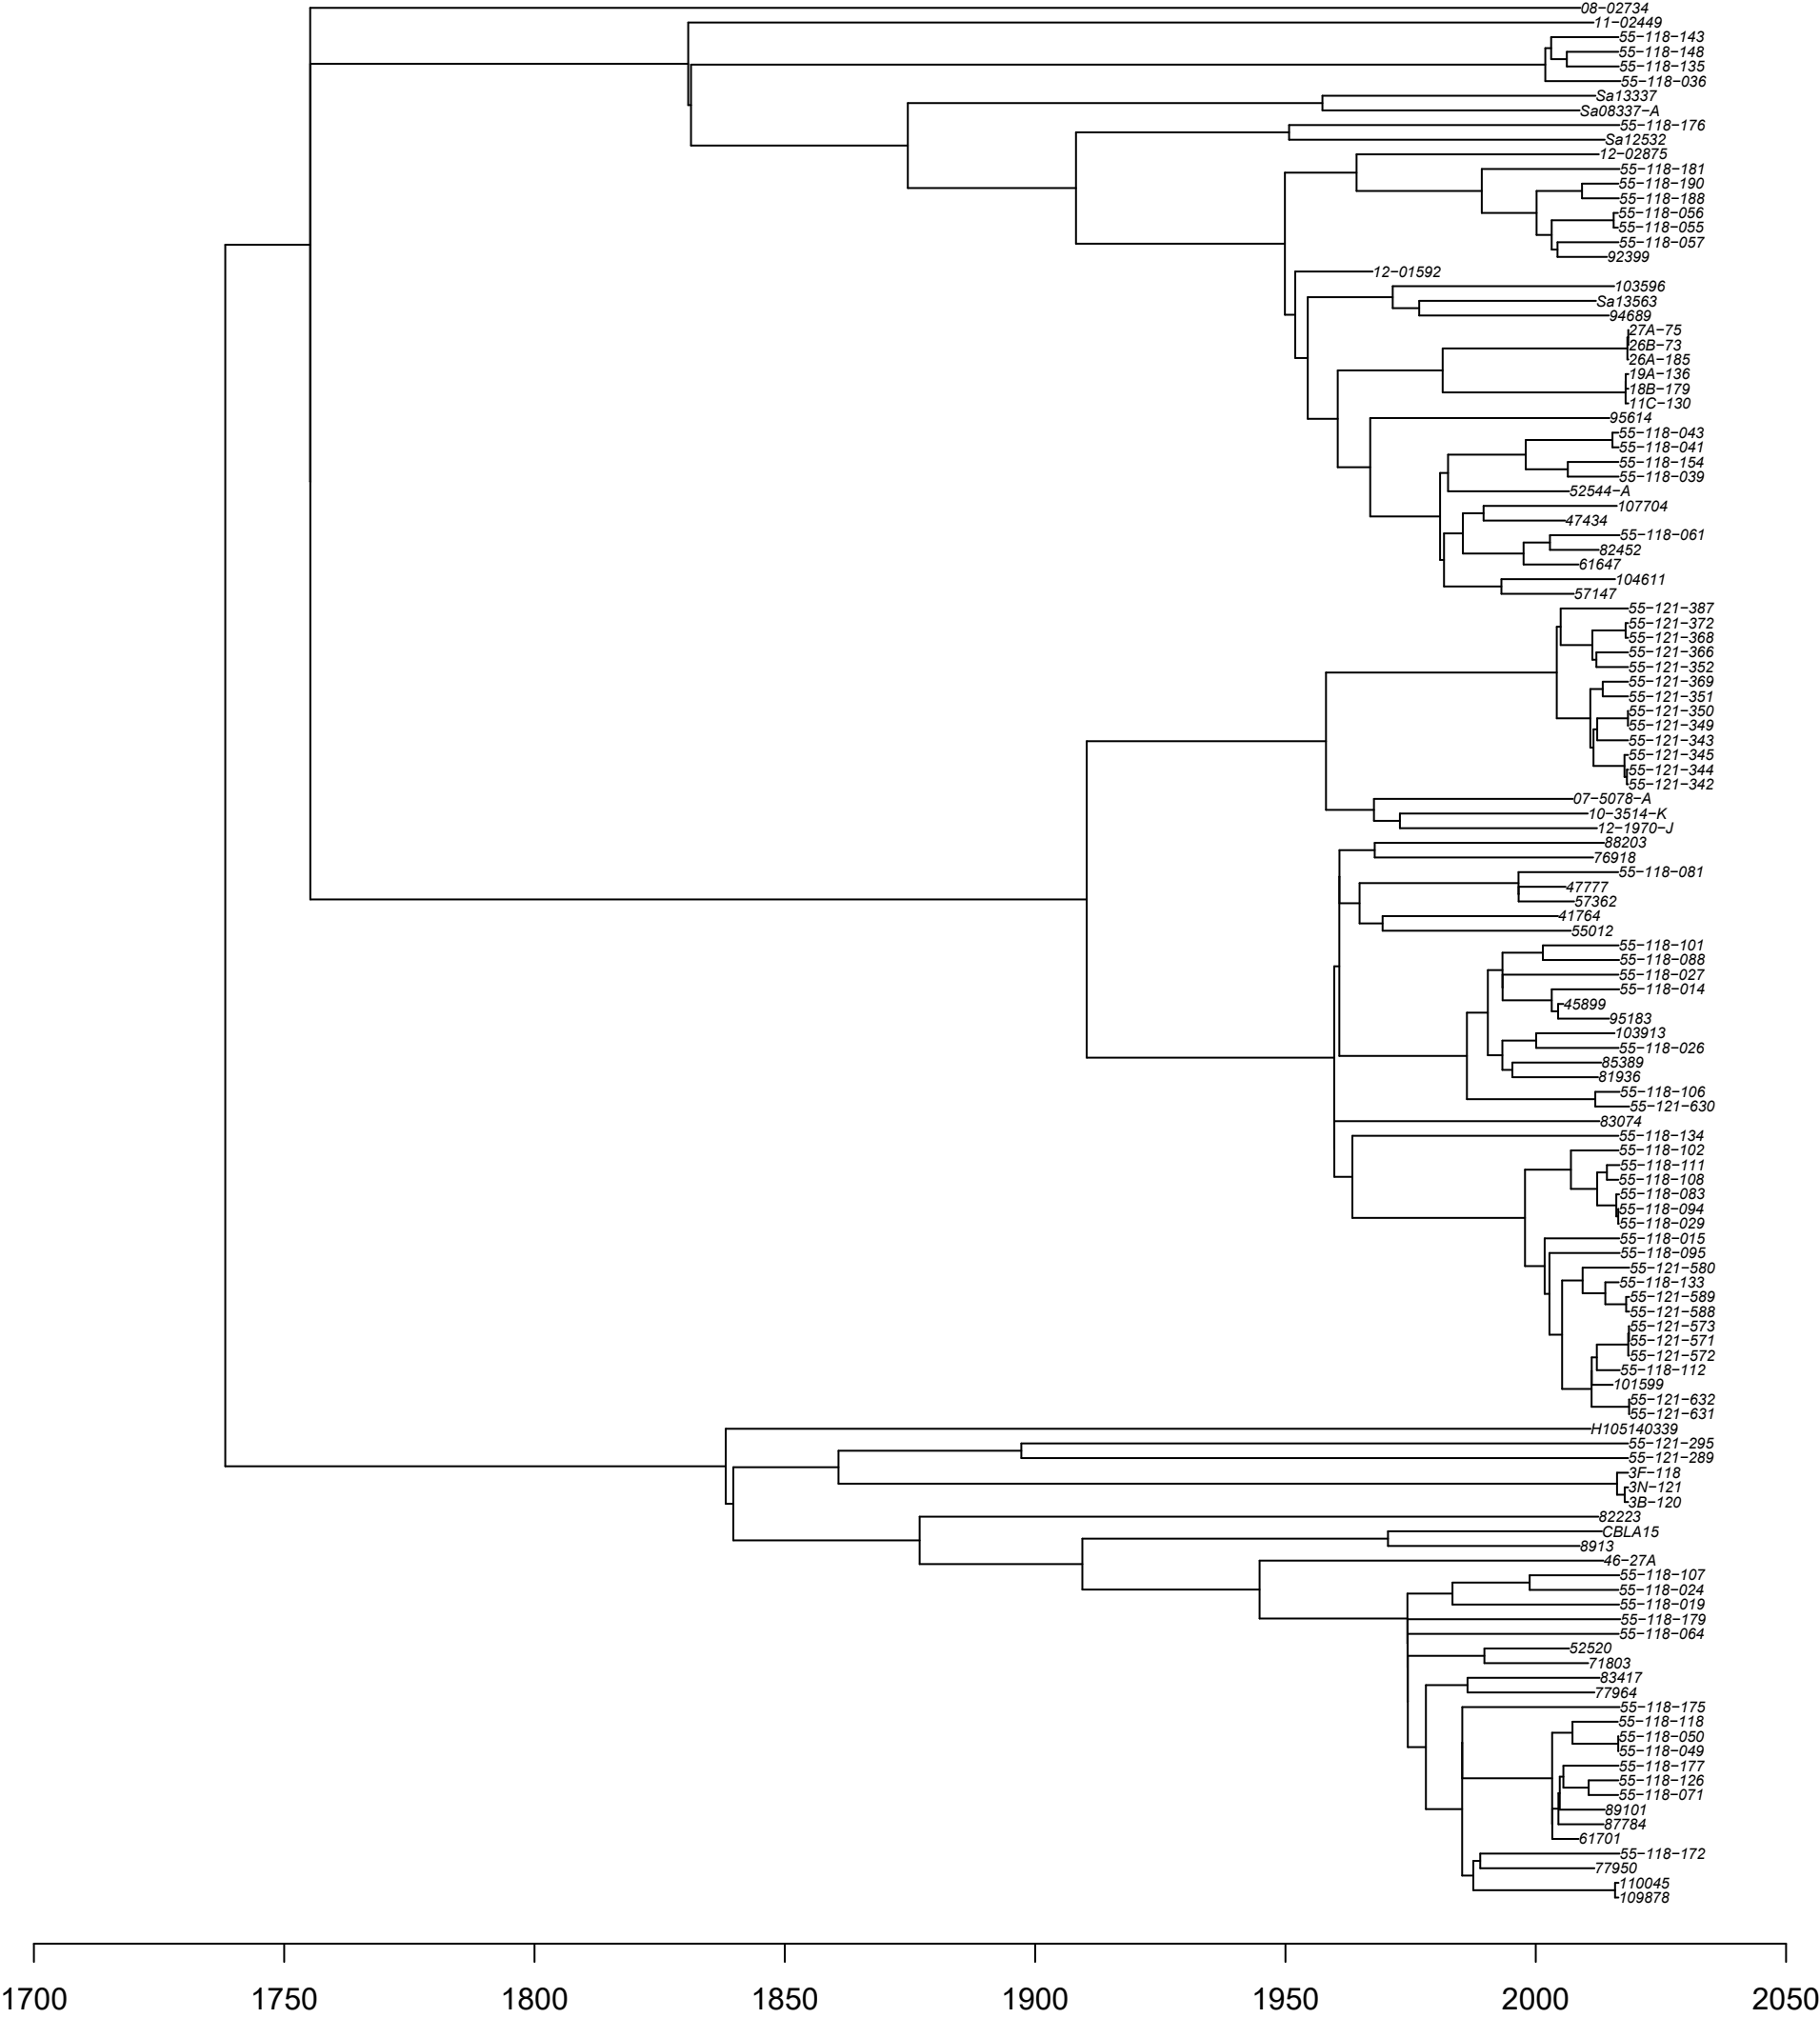

**Supplementary Fig. 11 | treedater genealogy of 130 *S. aureus* CC1943 isolates.** The genealogy was built from the recombination-corrected ClonalFrameML tree (Supplementary Fig. 5).
